# Supplementary material
Source: Royal Society of Chemistry journal article supplement (doi:10.1039/d6fd00042h)
Supplement: d6fd00042h1.pdf [file d6fd00042h1.pdf]

Supporting Information for

## Decoupling Amine Evolution from Sulfur Delivery in High-Temperature Metal Sulfide Nanocrystal Synthesis

Vincent Mauritz and Ryan W. Crisp\*

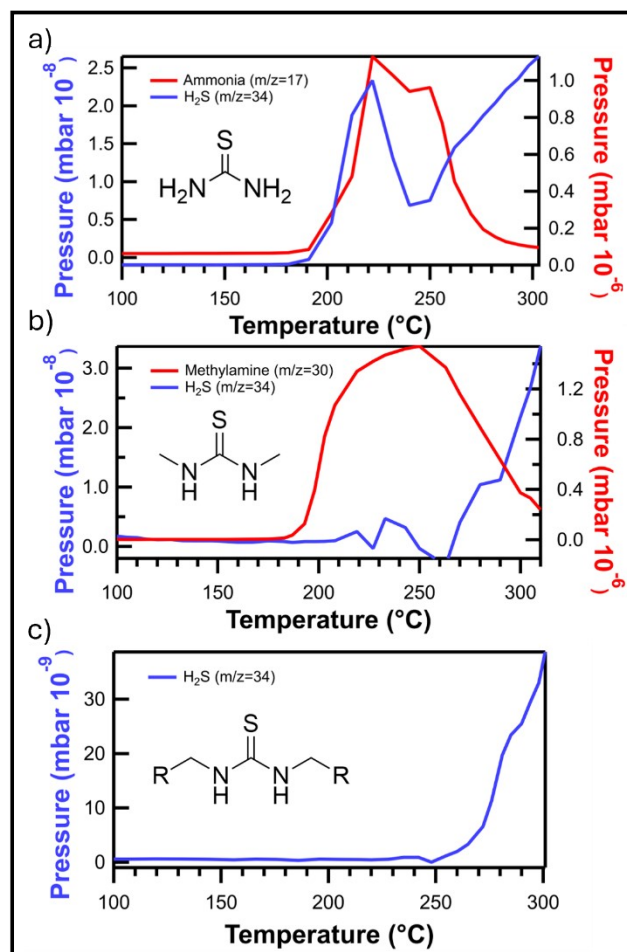

**Figure S1.** In situ mass spectrometry monitoring of gaseous products during thermal decomposition of (a) thiourea, (b) N,N'-dimethylthiourea, and (c) N,N'-diolethylthiourea (DOITU) in oleylamine. The plots show the evolution of characteristic mass fragments corresponding to amine species and  $H_2S$  as a function of temperature. Thiourea and N,N'-dimethylthiourea exhibit early amine evolution prior to sulfur release, whereas DOITU shows no detectable amine evolution before  $H_2S$  formation.

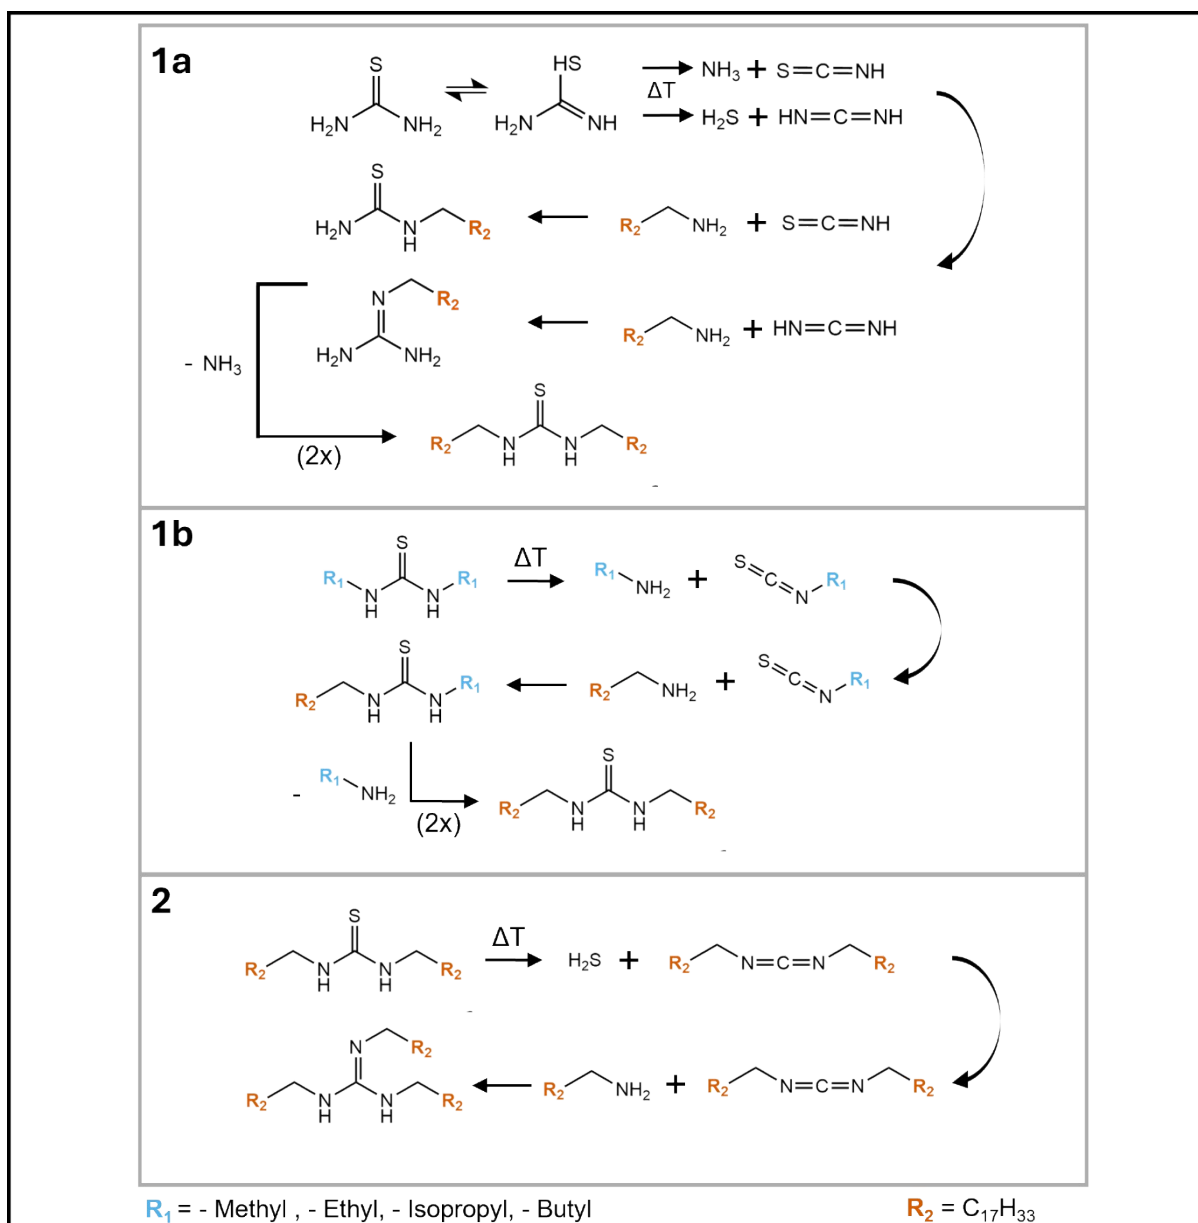

**Figure S2.** Proposed detailed thermal decomposition pathways of thiourea (1a) and N,N'-substituted thiourea derivatives (1b) in oleylamine. Both pathways converge through formation of asymmetric oleylthiourea intermediates that subsequently transform into N,N'-diolethiurea (DOITU). At elevated temperature, DOITU decomposes to release H<sub>2</sub>S and diolethiocarbodiimide, which can further react with oleylamine to form 1,2,3-triolethylguanidine.

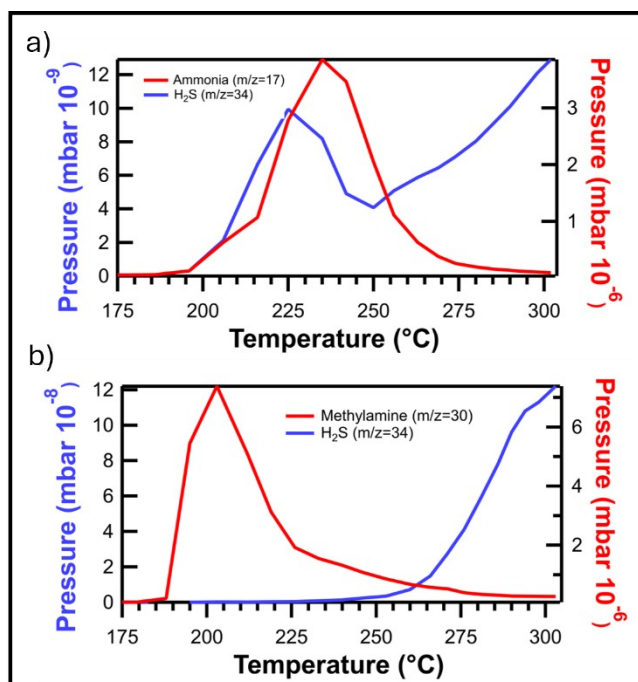

**Figure S3.** In situ mass spectrometry analysis of gaseous species during SrS nanocrystal synthesis using (a) thiourea and (b)  $N,N'$ -dimethylthiourea as sulfur precursors. The evolution profiles demonstrate that precursor decomposition in the presence of metal precursor follows the same sequence observed in neat oleylamine, with amine evolution preceding  $\text{H}_2\text{S}$  formation.

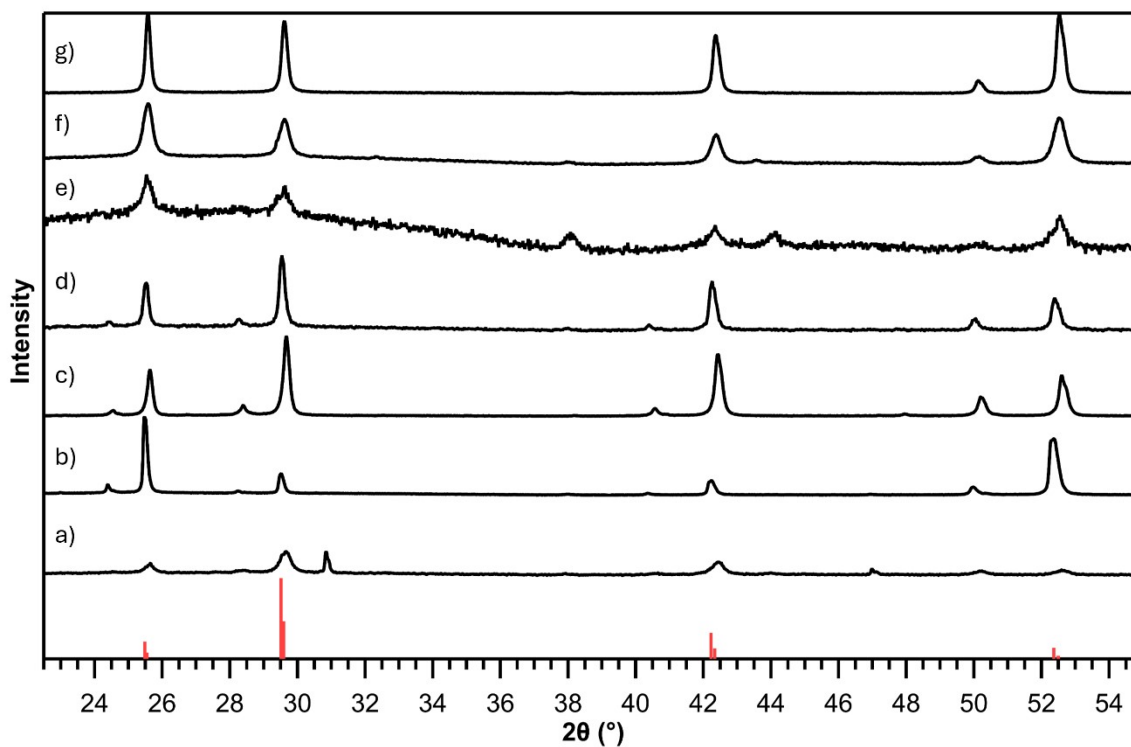

**Figure S4.** Powder X-ray diffraction patterns of products obtained after 5 min reactions at different temperatures using (a,b) thiourea, (c,d)  $N,N'$ -dimethylthiourea, and (e–g)  $N,N'$ -dioleylthiourea as sulfur precursors. The reference pattern of SrS is included for comparison. Reactions conducted near the temperature of peak amine evolution for conventional thioureas show little or no crystalline SrS formation, whereas DOITU consistently produces crystalline material across the temperature range.

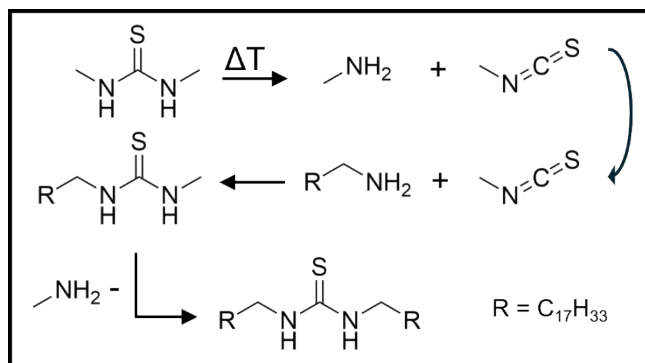

**Figure S5.** Proposed reaction pathway for the formation of N,N'-diolelylthiourea (DOITU) from N,N'-dimethylthiourea in oleylamine during thermal treatment.

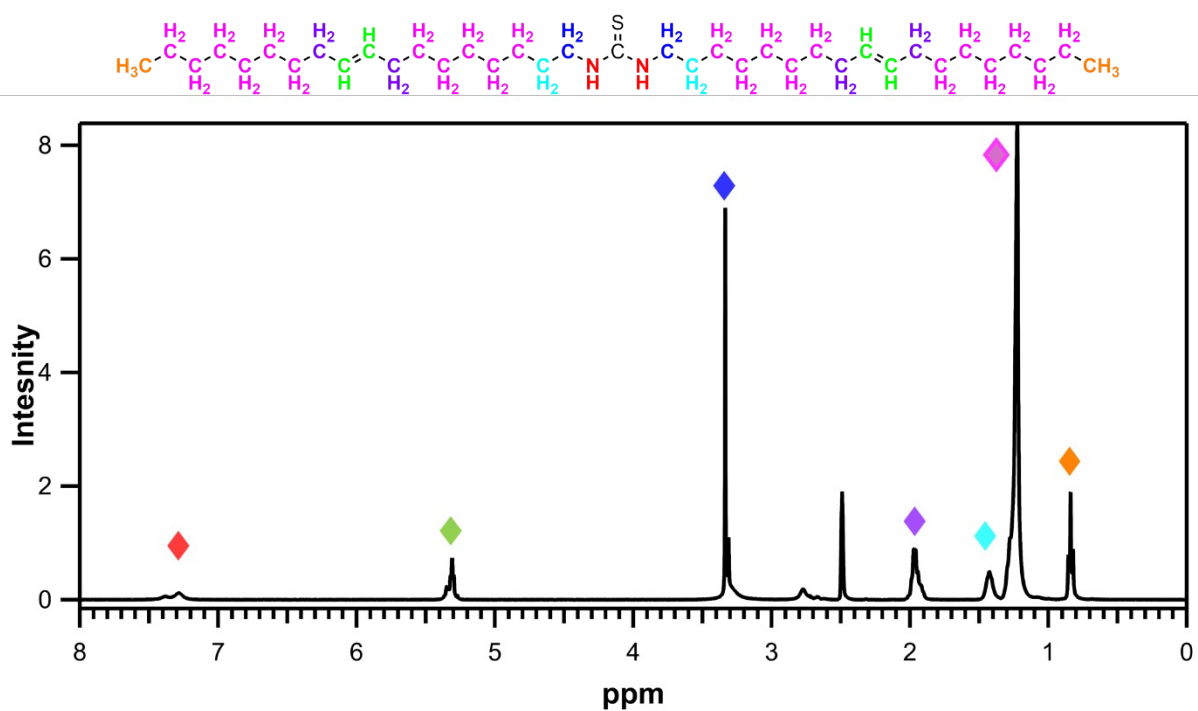

**Figure S6.**  $^1\text{H}$  NMR spectrum of N,N'-diolelylthiourea (DOITU) recorded in  $\text{DMSO-d}_6$ , confirming successful synthesis of the precursor. Characteristic resonances corresponding to the oleyl chains and thiourea NH groups are observed; minor signals originate from residual oleylamine and solvent.  $\delta = 7.38$  (s, 2H,  $\text{NH}_2$ , residue oleylamine),  $\delta = 7.30$  (s, 2H, NH, N,N'-diolelylthiourea),  $\delta = 5.30$  (m, 4H, CH, N,N'-diolelylthiourea),  $\delta = 3.35$  (s, 2H,  $\text{H}_2\text{O}$ ,  $\text{H}_2\text{O}$  from  $\text{DMSO-d}_6$ ),  $\delta = 3.31$  (s, 4H,  $\text{CH}_2$ , N,N'-diolelylthiourea),  $\delta = 2.77$  (s, 2H,  $\text{CH}_2$ , residue oleylamine),  $\delta = 2.50$  (s, 1H,  $\text{CH}_3$ ,  $\text{DMSO-d}_6$ ),  $\delta = 1.96$  (m, 8H,  $\text{CH}_2$ , N,N'-diolelylthiourea),  $\delta = 1.43$  (t, 4H,  $\text{CH}_2$ , N,N'-diolelylthiourea),  $\delta = 1.24$  (m, 22H,  $\text{CH}_2$ , N,N'-diolelylthiourea),  $\delta = 0.83$  (t, 6H,  $\text{CH}_3$ , N,N'-diolelylthiourea).

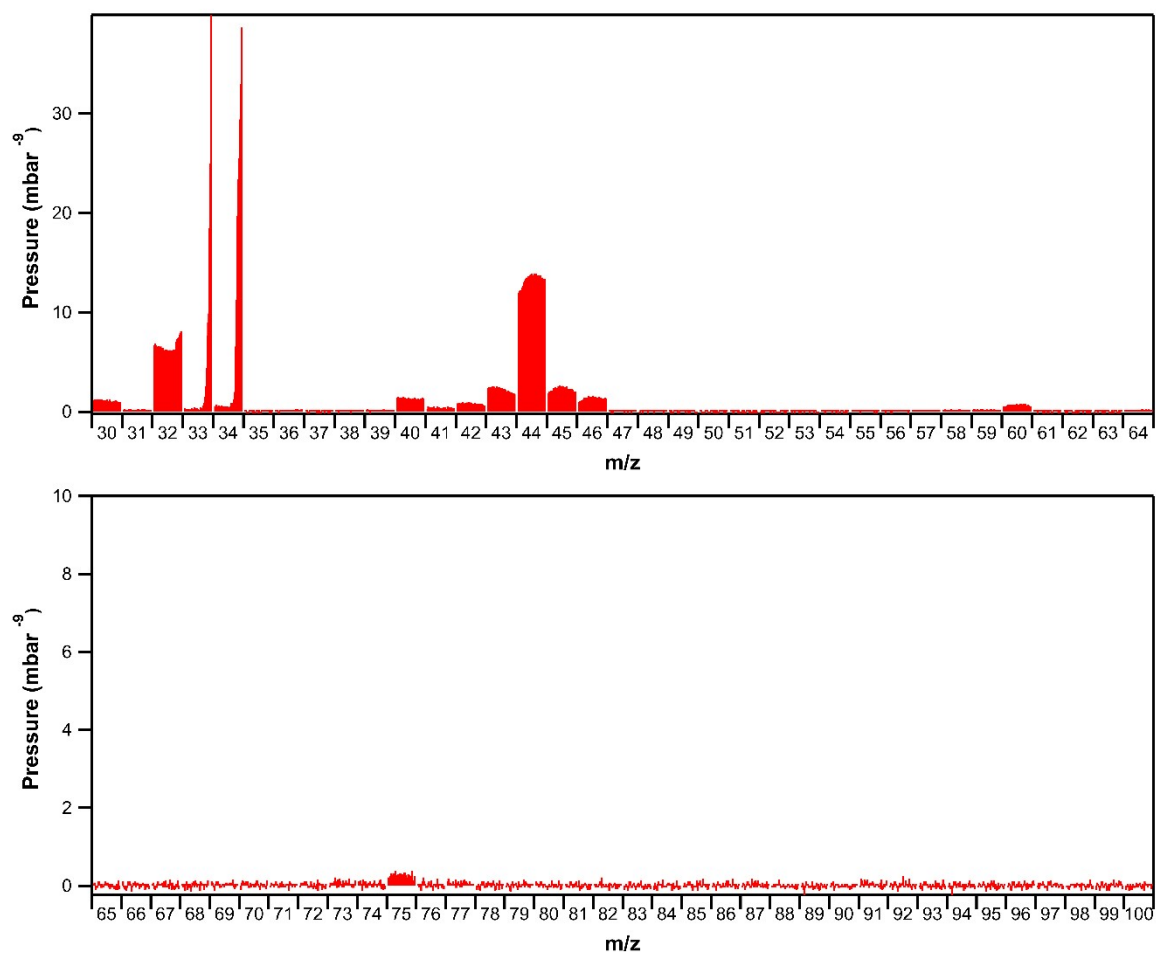

**Figure S7.** Full mass spectrometry scan ( $m/z$  30–100) recorded during thermal decomposition of *N,N'*-diolethiurea in oleylamine. The absence of signals corresponding to low-mass amine fragments confirms that DOITU does not release amines prior to sulfur evolution. Signals at  $m/z$  30–46, 60, and 75 originate from background air contamination and remain constant during the experiment.
